# Supplementary material for: Evolutionary and Medical Consequences of Archaic Introgression into Modern Human Genomes
Source: Preprints.org preprint supplement (doi:10.20944/preprints201806.0287.v1), 2018-06-19
Supplement: Supplementary file 2 [file supplementary]

## Sheet: Sheet1
introgression refused by more recent studies or not confirmed
Name of affected genomic region	Genomic information on introgressed variants (SNPs, haplotypes)	Chromosomal and genomic positions of affected regions	chromosome	Adaptive value (if available)	Result of selection tests (if available)	Archaic origin	Affected populations, frequency (if available)	Medical/phenotypic implication; gene function	Source
Brain, mental activity, neural system
MAP	H2 haplotype within inversion 17q21.31, 1.8Mb	45894382-46028334 (GRCh38.p12)	17	beneficial	potential positive selection or extraordinary genetic drift	Neanderthal	mainly in Southwest Asia and Southern Europe, 21-32%	Microtubule-associated protein tau supposedly introgressed allele is advantageous in comparison with H1 haplotype playing a role in neurodegenerative disease. Susceptibility locus for diseases with tangles, including progressive supranulear palsy and corticobasal degeneation and possibly including Parkinson dementia complex of Guam. Associated with increased fecundity and higher recombination rat…	Hardy et al. 2005; Setó-Salvia et al. 2012	Neanderthal and Denisovan genomes failed to provide evidence of introgressive alleles.
MCPH1	haplogroup D; 8p23.1	6406592 - 6648505 (GRCh38.p12)	8	beneficial	positive selection of advantageous alleles	Neanderthal	around 70% worldwide; most common in Eurasia, New Guinea and New World populations; much less common within Africa	Gene microcephalin regulates brain size during development, essential role in promoting the proliferation of neural progenitor cells during neurogenesis.	Evans et al. 2006
ASB1	rs75804782; archaic haplotype (hg19): 239316043–239470654	239316043–239470654 (GhRch37/hg19)	2	beneficial			individuals of British ancestry	Morning or evening person (chronotype), sleep	Dannemann&Kelso 2017
EXOC6	rs112294410; archaic haplotype (hg19): 94574048–94756023	94574048–94756023 (GhRch37/hg19)	10	beneficial			individuals of British ancestry	Daytime dozing or sleeping (narcolepsy)	Dannemann&Kelso 2017
GPR26	18 SNPs in a 53kb LD-block, rs77509056, rs34374660, rs17608529, rs17676917, rs17676960, rs17608655, rs17608690, rs117380193, rs59846519, rs4980201, rs75795353, rs150150087, rs143384481, rs4980208, rs80113622, The telomeric end of the gene; rs79867143, rs4980157, rs4980255	125447351–125500316 (GhRch37/hg19)	10			Neanderthal	Individuals of European descend	A G-protein coupled receptor preferentially expressed in the human brain, showed the strong association with brain/skull structure. In determining NeanderScore related changes in brain morphology, two significant cortical regions were found, the intraparietal sulcus (IPS) and primary visual cortex, which both directly underlie the region of skull shape associations. It may play a role in developm…	Gregory et al. 2017
RNU6-865З	gene indel; SNP rs13060137, position 100647927 in LD with indel in position 100671648 (GhRch37/hg19)		3			Neanderthal	Europeans (allele frequency = 0.15); East Asians (allele frequency = 0.002)	Suicide attempts in bipolar disorder	Chintalapati et al. 2017
EFCAB5, SSH2, CCDC55	rs9902453	28344276-28389103 (GhRch37/hg19)	17			Neanderthal	Turkish; allele frequency = 0.40625	Addiction	Taskent et al. 2017
intergenic	rs13196614		6			Neanderthal	Turkish; allele frequency = 0.25	Migraine	Taskent et al. 2017
intergenic	rs10511112	80319980-80428074 (GhRch37/hg19)	3			Neanderthal	Turkish; allele frequency = 0.03125	Migraine	Taskent et al. 2017
SOX2-OT	rs4854912	180760431-180798672 (GhRch37/hg19)	3			Neanderthal	Turkish; allele frequency = 0.3125	Neurological	Taskent et al. 2017
intergenic	rs1995082	76993424-77038245 (GhRch37/hg19)	16			Neanderthal	Turkish; allele frequency = 0.28125	Neurological	Taskent et al. 2017
LOC100509398	rs12639288	167659127-167707035 (GhRch37/hg19)	3			Neanderthal	Turkish; allele frequency = 0.21875	Neurological	Taskent et al. 2017
intergenic	rs7379133	2143003-2241764 (GhRch37/hg19)	5			Neanderthal	Turkish; allele frequency = 0.09375	Neurological	Taskent et al. 2017
BRWD1	rs2150410	40539790-40587049 (GhRch37/hg19)	21			Neanderthal	Turkish; allele frequency = 0.09375	Neurological	Taskent et al. 2017
NR	rs11587682	15293153-150362014 (GhRch37/hg19)	1			Neanderthal	Turkish; allele frequency = 0.09375	Neurological	Taskent et al. 2017
SERINC5, KRT18P45	rs71636213	79553250-79612959 (GhRch37/hg19)	5			Neanderthal	Turkish; allele frequency = 0.0625	Neurological	Taskent et al. 2017
CECR6, IL17RA	rs971768	17593929-17679377 (GhRch37/hg19)	22			Neanderthal	Turkish; allele frequency = 0.0625	Neurological	Taskent et al. 2017
GYPC	rs1550404	127056269-127363088 (GhRch37/hg19)	2			Neanderthal	Turkish; allele frequency = 0.0625	Neurological	Taskent et al. 2017
NR	rs17716202	55832939-55917878 (GhRch37/hg19)	5			Neanderthal	Turkish; allele frequency = 0.03125	Neurological	Taskent et al. 2017
C4orf22	rs141990949	81240231-81365932 (GhRch37/hg19)	4			Neanderthal	Turkish; allele frequency = 0.03125	Neurological	Taskent et al. 2017
KNSTRN	rs78153629	40621842-40708701 (GhRch37/hg19)	15			Neanderthal	Turkish; allele frequency = 0.03125	Neurological	Taskent et al. 2017
intergenic	rs17154929	44476107-44803758 (GhRch37/hg19)	10			Neanderthal	Turkish; allele frequency = 0.03125	Neurological	Taskent et al. 2017
NTRK2	rs138535351	9q21.33; 84668458-85027070 (GRCh38.p12)	9			Neanderthal	European ancestry (white race)	This gene encodes a neurotrophic tyrosine receptor kinase that regulates neuron survival and differentiation as well as synapse formation. This gene contains a pair of adjacent Neanderthal tag SNPs, which show strong signatures of downregulation. Mutations and polymorphisms in this gene have been associated with a range of neuropsychiatric and neurological disorders including depression, suicide …	McCoy et al. 2017
APLNR	rs746885	11q12.1; 57233577-57237453 (GRCh38/hg38)	11	beneficial	positive selection	Neanderthal	European ancestry (white race)	Apelin receptor gene exhibits strong allele-specific exspression favoring the Neanderthal allele in brain tissues, but ASE favoring the modern human allele in non-brain tissues. Apelin is a signal peptide that influences several aspects of cardiac, digestive, brain, and vascular function, including regulation of oxygen levels. The peptide and its receptor encoded by APLNR have been implicated in …	McCoy et al. 2017
CLCN2	Inframe insertion in position 184071131 (GhRch37/hg19)		3	likely disruptive		Neanderthal	Europeans (allele frequency = 0.02)	Chloride channel protein 2 (CIC) is a protein that in humans is encoded by the CLCN2 gene. Mutations of this gene have been found to cause leukoencephalopathy (PMID: 23707145) and Idiopathic generalised epilepsy (OMIM: 600699). CLCN2 contains a transmembrane region that is involved in chloride ion transport as well two intracellular copies of the CBS domain. The channel's function is thought to b…	Chintalapati et al. 2017
BAI3	Intronic deletion in position 69910260 (GhRch37/hg19)		6	likely disruptive		Neanderthal	Europeans (allele frequency = 0.04); East Asians (allele frequency = 0.17)	This p53-target gene encodes a brain-specific angiogenesis inhibitor, a seven-span transmembrane protein, and is thought to be a member of the secretin receptor family. Brain-specific angiogenesis proteins BAI2 and BAI3 are similar to BAI1 in structure, have similar tissue specificities, and may also play a role in angiogenesis. Receptor that plays a role in the regulation of synaptogenesis and d…	Chintalapati et al. 2017
GRIN2B		13714409-14133022 (GhRch37/hg19)	12			Neanderthal/Denisovan	European	Involved in neurodevelopmental disorders. The C-terminal domains of GRIN2A and GRIN2B (GluN2B) differentially regulate behavioral phenotypes in mice (e.g. impulsivity and anxiety).	Mozzi et al. 2017
SYNGAP1	108 kb haplotype defined by 20 archaic SNPs in full linkage disequilibrium was found to span SYNGAP1 and nearby genes	33387846-33421466 (GhRch37/hg19)	6	Advantageous	Positive selection	Neanderthal/Denisovan	European	Involved in neurodevelopmental disorders. De novo mutations in SYNGAP1 are thought to represent a relatively common cause of intellectual disability with epilepsy, and most detected changes in affected subjects are loss-of-function mutations	Mozzi et al. 2017
CUTA	Five SNPs of the introgressed haplotype are reported as eQTLs		6	Likely advantageous		Neanderthal/Denisovan	European	The archaic SNPs are associated with higher expression level in different brain areas. Regulate the signaling of molecules acting as neurotransmitter, namely acetylcholyne and γ-aminobarbituric acid (GABA) and ffects the folding, oligomerization, and secretion of acetylcholynesterase. CUTA also modulates the generation of β-amyloid peptides (Aβ), major components of senile plaques typical of Alzh…	Mozzi et al. 2017
PHF1	Five SNPs of the introgressed haplotype are reported as eQTLs		6	Likely advantageous		Neanderthal/Denisovan	European	The archaic SNPs are associated with higher expression level in different brain areas. Regulate the signaling of molecules acting as neurotransmitter, namely acetylcholyne and γ-aminobarbituric acid (GABA). The PHF1b isoform promotes the transcription of GABRB1, which encodes GABA type A receptor (GABAAR); this results in the regulation of GABA-mediated neurotransmission in the central nervous sy…	Mozzi et al. 2017
KCNH1		78644634-79397577 (GhRch37/hg19)	1			Neanderthal/Denisovan	European	Involved in neurodevelopmental disorders.	Mozzi et al. 2017
MAPK1		22113946-22221970 (GhRch37/hg19)	22			Neanderthal/Denisovan	Asian	Involved in neurodevelopmental disorders. Innate immunity signal transducer.	Deschamps et al., 2016; Mozzi et al., 2017
MAP3K1		56110899-56191978 (GhRch37/hg19)	5			Neanderthal/Denisovan	Asian	Involved in neurodevelopmental disorders. Innate immunity signal transducer.	Deschamps et al., 2016; Mozzi et al., 2017
MYC		128748314-128753680 (GhRch37/hg19)	8		Positive selection	Neanderthal/Denisovan	Asian	Involved in neurodevelopmental disorders. Selected sites play a role in cancer and/or apoptosis. An interesting possibility to explain these findings is selfish spermatogonial selection: variants that increase the rate of cell division or decrease the probability of apoptosis in a given germline cell are favored, irrespective of the fitness effect on the embryo.	Mozzi et al. 2017
TBR1		162272619-162281573 (GhRch37/hg19)	2			Neanderthal/Denisovan	Asian	Involved in neurodevelopmental disorders.	Mozzi et al. 2017
WDR5		137001209-137025094 (GhRch37/hg19)	9			Neanderthal/Denisovan	Asian	Involved in neurodevelopmental disorders.	Mozzi et al. 2017
ADAMTSL3 (MIM: 609199)	rs12902672, non-synonymous archaic allele: 84706461; archaic haplotype (hg19): 84703470–85114447		15	beneficial	Positive selection		individuals of British ancestry	Impedance of leg (left); associated eQTLs: brain (amygdala); GWAS phenotype: Schizophrenia; Brain - Amygdala (downregulation).	Dannemann&Kelso 2017; Dannemann et al. 2017
ADAMTSL3	rs950169; archaic haplotype: 84641125-85431566 (GhRch37/hg19)		15				European ancestry (white race)	Birth height and schizophrenia risk-associated introgression tag SNP (rs950169) in ADAMTSL3 shows evidence of allele-specific expression mediated by an effect on splicing regulation. The Neanderthal-introgressed (T) allele of this variant is predicted to increase binding of the SRp55 splicing factor compared to the modern human (C) allele and splice out a portion of exon 30 containing the SNP its…	McCoy et al. 2017
OAS3	archaic haplotype: 113350796-113444418 (GhRch37/hg19)		12		positive selection	Neanderthal	Europeans (27.8-44.4%); East Asians (15.9-34.7%); South Asians (19.2-34.9%)	Introgressed alleles modify expression of the gene. Archaic alleles in this gene are associated with higher expression in thyroid and pancreas and vagina. Individuals carrying archaic alleles show down-regulation of this gene in esophagus mucosa and spleen, and in fibroblasts as well as three brain regions (hippocampus, putamen, and caudate nucleus). Brain - Caudate (basal ganglia) (downregulatio…	Deschamps et al., 2016; Dannemann et al. 2017
COL13A1	rs17497526; 71580120; archaic haplotype: 71580120-71591034 (GhRch37/hg19).		10		positive selection	Neanderthal	Europeans (7.4–15.3%); East Asians (1.9–5.3%); South Asians (8.2–11.1%)	Individuals carrying the archaic allele show significantly lower expression of COL13A1 in the cerebellum compared to individuals without the introgressed archaic allele. Some studies that have suggested a lower prevalence of Parkinson’s disease in Asia, opening the question of whether the archaic introgression may contribute to Parkinson’s risk in Europeans. GWAS phenotype: Parkinson`s disease. B…	Dannemann et al. 2017
MMP7	archaic haplotype: 102344970-102353988 (GhRch37/hg19).		11		positive selection	Neanderthal	Europeans, Asians	Nerve - Tibial (downregulation), Vagina (upregulation); accessory molecule in innate immunity	Deschamps et al., 2016; Dannemann et al., 2017
OAF	archaic haplotype: 120084221-120124302 (GhRch37/hg19).		11		positive selection	Neanderthal		Adipose - Visceral (Omentum) (upregulation), Brain - Caudate (basal ganglia) (upregulation), Brain – Cerebellum (upregulation), Cells - Transformed fibroblasts (upregulation), Muscle – Skeletal (downregulation).	Dannemann et al. 2017
TRIM29	archaic haplotype: 120084221-120124302 (GhRch37/hg19).		11		positive selection	Neanderthal		Brain – Cortex (upregulation), Pancreas (upregulation), Small Intestine - Terminal Ileum (upregulation), Whole Blood (upregulation).	Dannemann et al. 2017
OR11A1	archaic haplotype: 29275499-29401057 (GhRch37/hg19).		6		positive selection	Neanderthal		Brain - Putamen (basal ganglia) (upregulation), Testis (downregulation)	Dannemann et al. 2017
OR12D2	archaic haplotype: 29275499-29401057 (GhRch37/hg19).		6		positive selection	Neanderthal		Brain - Putamen (basal ganglia) (upregulation)	Dannemann et al. 2017
Immunity
HLA class I genes of the human Major Histocompatibility Comples (MHC)	HLA-A*02	6p22.1; 29942470-29945884 (GRCh38.p12)	6	beneficial	strong multi-allelic balancing selection	Denisovan	worldwide except Africa	Vital immune system components.
HLA class I genes of the human Major Histocompatibility Comples (MHC)	HLA-A*11:01	6p22.1; 29942470-29945884 (GRCh38.p12)	6	beneficial	strong multi-allelic balancing selection	Denisovan	Asia, less common in Europe	Vital immune system components. The role in controling NK cells, lymphosytes essential for immune defense and reproduction. T cell-mediated protection against some strains of Epstein-Barr virus (EBV) and in combination with a peptide derived from EBV is one of only two HLA ligands for the KIR3DL2 NK cell receptor. Strongest ligand for KIR2DS4.	Abi-Rached et al. 2011
HLA class I genes of the human Major Histocompatibility Comples (MHC)	HLA-A*24:02	6p22.1; 29942470-29945884 (GRCh38.p12)	6	beneficial	strong multi-allelic balancing selection	archaic group	outside Africa	Vital immune system components. The role in controling NK cells, lymphosytes essential for immune defense and reproduction. Strong Bw4 ligands for KIR3DL1	Abi-Rached et al. 2011
HLA class I genes of the human Major Histocompatibility Comples (MHC)	HLA-A*26	6p22.1; 29942470-29945884 (GRCh38.p12)	6	beneficial	strong multi-allelic balancing selection	Neanderthal	Eurasian and Oceanian populations, later in Africans	Vital immune system components. T cell immunity	Abi-Rached et al. 2011
HLA class I genes of the human Major Histocompatibility Comples (MHC)	HLA-A*31:02	6p22.1; 29942470-29945884 (GRCh38.p12)	6	beneficial	strong multi-allelic balancing selection	archaic group	outside Africa	Vital immune system components. T cell immunity	Abi-Rached et al. 2011
HLA class I genes of the human Major Histocompatibility Comples (MHC)	HLA-A*66	6p22.1; 29942470-29945884 (GRCh38.p12)	6	beneficial	strong multi-allelic balancing selection	Neanderthal	Eurasia	Vital immune system components.	Abi-Rached et al. 2011
HLA class I genes of the human Major Histocompatibility Comples (MHC)	HLA-B*07	6p21.33; 31353866-31357245 (GRCh38.p12)	6	beneficial	strong multi-allelic balancing selection	Neanderthal	Eurasian and Oceanian populations, later in Africans	Vital immune system components. T cell immunity	Abi-Rached et al. 2011
HLA class I genes of the human Major Histocompatibility Comples (MHC)	HLA-B*51	6p21.33; 31353866-31357245 (GRCh38.p12)	6	beneficial	strong multi-allelic balancing selection	Neanderthal	Eurasian and Oceanian populations, later in Africans	Vital immune system components. The role in controling NK cells, lymphosytes essential for immune defense and reproduction. Strong Bw4 ligands for KIR3DL1	Abi-Rached et al. 2011
HLA class I genes of the human Major Histocompatibility Comples (MHC)	HLA-B*73:01	6p21.33; 31353866-31357245 (GRCh38.p12)	6	beneficial	strong multi-allelic balancing selection	Denisovan	west Asia	Vital immune system components. The role in controling NK cells, lymphosytes essential for immune defense and reproduction. It is one of only two HLA-B allotypes carrying the C1 epitope, the ligand for KIR2DL3	Abi-Rached et al. 2011; Yasukochi and Ohashi 2017: basing on phylogenetic reconstruction there is no enough evidence for introgression.
HLA class I genes of the human Major Histocompatibility Comples (MHC)	HLA-C*7:02	6p21.33; 31268749-31272136 (GRCh38.p12)	6	beneficial	strong multi-allelic balancing selection	Neanderthal	Eurasia, Oceania, later in Africans; prominenet in Amerindians	Vital immune system components. The role in controling NK cells, lymphosytes essential for immune defense and reproduction. Strong C1 ligand for KIR2DL2/3	Abi-Rached et al. 2011
HLA class I genes of the human Major Histocompatibility Comples (MHC)	HLA-C*12:02	6p21.33; 31268749-31272136 (GRCh38.p12)	6	beneficial	strong multi-allelic balancing selection	Denisovan	Asia with later spreading to Africa	Vital immune system components.	Abi-Rached et al. 2011
HLA class I genes of the human Major Histocompatibility Comples (MHC)	HLA-C*15:05	6p21.33; 31268749-31272136 (GRCh38.p12)	6	beneficial	strong multi-allelic balancing selection	Denisovan	throughout Asia, Oceania and Australia	Vital immune system components.	Abi-Rached et al. 2011
HLA class I genes of the human Major Histocompatibility Comples (MHC)	HLA-C*16:02	6p21.33; 31268749-31272136 (GRCh38.p12)	6	beneficial	strong multi-allelic balancing selection	Neanderthal	west Asia	Vital immune system components.	Abi-Rached et al. 2011
KIR	KIR3DS1*013	71573-86270 (GRCh38/hg38)	19	beneficial	strong multi-allelic balancing selection	Denisovan	common outside Africa, especially in Australia and Oceaniarare sub-Saharan Africans	Vital immune system components. Killer-cell immunoglobulin-like receptors (KIR) of NK cells	Abi-Rached et al. 2011
STAT2	haplotype N	12q13.3; 56341597-56360253 (GRCh38/hg38)	12	beneficial	positive selection, candidates for local adaptation	Neanderthal	Eurasians, 10-fold higher frequency in Melanesians	innate immunity. Key role in interferon signaling pathways. Potential associations with autoimmune disorders	Mendez et al. 2012
	rare haplotype D	12q13.3; 56341597-56360253 (GRCh38/hg38)	12	beneficial		Denisovan	Papuan		Mendez et al. 2012
OAS1	7-kb region studied, span of the "deep" lineage introgressed region - around 90 kb	12q24.13; 112906777-112932190 (GRCh38/hg38)	12		candidate for balancing selection and local adaptation	speculative "Ghost" population of Denisova origin admixed with H.erectus	Papuan haplotype is nearly restricted to populations from eastern Indonesia and Melanesia	Encodes for an enzyme (2'-5' oligoadenylate synthetase 1) with an important antiviral function that is involved in the innate immune response. Variants at OAS1 implicated with susceptibility to infectious diseases (e.g., West Nile Fever and severe acute respiratory syndrome [SARS]), severity of Hepatitis C infections and susceptibility to the autoimmune disorder multiple sclerosis.	Mendez et al. 2013
OAS1			12				Europeans, Asians	Innate immunity sensor	Deschamps et al., 2016
OAS2	archaic haplotype: 113350796-113444418 (GhRch37/hg19)		12		positive selection	Neanderthal	Europeans (27.8-44.4%); East Asians (15.9-34.7%); South Asians (19.2-34.9%)	Introgressed alleles modify expression of the gene. Archaic alleles in this gene are associated with higher expression in thyroid and pancreas and vagina. Individuals carrying archaic alleles show down-regulation of this gene in fibroblasts. Cells - Transformed fibroblasts (downregulation), Thyroid (upregulation)	Deschamps et al., 2016; Dannemann et al., 2017
CCRL2, CCR5, CCR9, CCR1, CCR2, CCR3	rs13098911	46061218-46628253 (GhRch37/hg19)	3			Neanderthal	Turkish; allele frequency = 0.15625	Autoimmune; celiac desease; the haplotype overlaps with the CC motif chemokine receptor (CCR) gene family with a known role in HIV infection; other variants not linked to the Neanderthal haplotype, were associated with autoimmune Behcet’s disease.	Taskent et al. 2017
TNPO3	rs12531711, 128617466 (GhRch37/hg19)	128683539-128748326 (GhRch37/hg19)	7		positive selection	Neanderthal	Europeans (8.8–11.6%); East Asians (0-0.5%); South Asians (8.1–21.9%)	Regulatory archaic variant modifies the expression of TNPO3 in brain and is associated with multiple auto-immune phenotypes. GWAS phenotype: Systemic lupus erythematosus, Primary biliary cirrhosis, Systemic sclerosis, Rheumatoid arthritis, Celiac disease and Rheumatoid arthritis, Multiple sclerosis, Systemic lupus erythematosus and Systemic sclerosis; Brain - Caudate (basal ganglia) (upregulation…	Dannemann et al. 2017
TNPO3, IRF5	rs13239597	128683539-128748326 (GhRch37/hg19)	7			Neanderthal	Turkish; allele frequency = 0.125	Autoimmune	Taskent et al. 2017
MUC19, LRRK2	rs11175593	40543545-40651972 (GhRch37/hg19)	12			Neanderthal	Turkish; allele frequency = 0.0625	Autoimmune	Taskent et al. 2017
SLIT3	rs12188351	168353129-168521405 (GhRch37/hg19)	5			Neanderthal	Turkish; allele frequency = 0.03125	Autoimmune	Taskent et al. 2017
NFATC1, TST	rs7236492	77147840-77248402 (GhRch37/hg19)	18			Neanderthal	Turkish; allele frequency = 0.03125; Europeans	Autoimmune; transcription in innate immunity	Deschamps et al., 2016; Taskent et al., 2017
STAT2, IL23A	rs2066819	56627300-56753822 (GhRch37/hg19)	12			Neanderthal	Turkish; allele frequency = 0.03125	Autoimmune	Taskent et al. 2017
TOM1	rs138740	35674777-35712614 (GhRch37/hg19)	22			Neanderthal	Turkish; allele frequency = 0.59375	Immune	Taskent et al. 2017
NR	rs10504390	66474002-66898457 (GhRch37/hg19)	8			Neanderthal	Turkish; allele frequency = 0.09375	Immune	Taskent et al. 2017
PDE4D	rs17444059	58513740-58617539 (GhRch37/hg19)	5			Neanderthal	Turkish; allele frequency = 0.0625	Immune	Taskent et al. 2017
NR	rs12530	32774930-32821541 (GhRch37/hg19)	22			Neanderthal	Turkish; allele frequency = 0.0625	Immune	Taskent et al. 2017
CEP72	rs4957048	537890-601789 (GhRch37/hg19)	5			Neanderthal	Turkish; allele frequency = 0.15625	Autoimmune	Taskent et al. 2017
TPPP	rs4957048	537890-601789 (GhRch37/hg19)	5			Neanderthal	Turkish; allele frequency = 0.15625	Autoimmune	Taskent et al. 2017
SLC15A4	rs3765107; archaic haplotype: 129271719-129330378 (GhRch37/hg19).	17q11.2; 30194319-30235968 (GRCh38/hg38)	12			Neanderthal	European ancestry (white race); Asians	The introgressed SNP of lysosomal transporter-encoding gene SLC15A4 associated with systemic lupus erythematosis. GWAS phenotype: Systemic lupus erythematosus; Artery - Aorta (upregulation), Testis (downregulation). SLC15A4 is required for endosomal Toll-like receptor (TLR) signaling and secretion of proinflammatory cytokines by plasmacytoid dendritic cells; downregulation. Innate immunity access…	Deschamps et al., 2016; McCoy et al. 2017
IL18	rs5744258, rs1834481, 112023827; archaic haplotype: 112005483-112084109 (GhRch37/hg19)	11q23.1; 112143251-112164117 (GRCh38/hg38)	11		positive selection	Neanderthal	Europeans (16.7-24.5%); East Asians (0-0.5%); South Asians (3.8-11.3%)	interleukin-18 (IL-18) levels (upregulation).The archaic allele is associated with reduced expression of IL18 in multiple tissues, including the pancreas, and IL18 levels/markers of inflammatory response in two GWAS studies. GWAS phenotypes: Interleukin-18 levels, Inflammatory biomarkers; Lung (downregulaiton), Pancreas (downregulation), Skin - Sun Exposed (Lower leg) (downregulation).	Deschamps et al., 2016; McCoy et al. 2017; Dannemann et al. 2017
TLR1	rs5743557; archaic haplotype: 38763693-38906951 (GhRch37/hg19); rs4833095	4p14; 38787555-38856817 (GRCh38/hg38)	4	beneficial	The TLR6-TLR1-TLR10 cluster has been proposed to be a hotspot of positive selection in human and non-human primates and is detected as a strongly supported case of local adaptation in Europeans.	Neanderthal	European ancestry (white race); Asians; CEU: 16%, CHB: 49%	An innate immunity sensor. The Neanderthal haplotype is associated with significantly increased expression of TLR1 (rs5743557). GWAS phenotype: Helicobacter pylori serologic status, Self-reported allergy; Brain - Hippocampus (upregulation), Cells - EBV-transformed lymphocytes (upregulation), Colon - Sigmoid (downregulation), Esophagus - Muscularis (downregulation), Liver (downregulation), Pituita…	Dannemann et al., 2016; Gittelman et al., 2016; Quach et al., 2016; Nédélec et al., 2016; Deschamps et al., 2016; McCoy et al., 2017; Dannemann et al., 2017
AC064874.1	Upstream deletion in position 236693080 (GhRch37/hg19)		2	likely disruptive		Neanderthal	East Asians (allele frequency = 0.01)	Immunity	Chintalapati et al. 2017
PRKRA	Intronic deletion in position 179301055 (GhRch37/hg19)		2	likely disruptive		Neanderthal	Europeans (allele frequency = 0.02); East Asians (allele frequency = 0.15)	This gene encodes a protein kinase activated by double-stranded RNA which mediates the effects of interferon in response to viral infection. Mutations in this gene have been associated with dystonia.	Chintalapati et al. 2017
MUC7	Haplogroup E bearing unbroken haplotype block of ~20 kb; rs7684907	4q13.3; 70430492-70482997	4	beneficial	positive selection	Unknown archaic African Hominin population	African	MUC7 encodes one of the most abundant proteins in human saliva. Mucin-7 is a small soluble mucin protein which, like other mucins, harbors subexonic repeat sequences rich in the amino acids proline, threonine, and serine (PTS repeats). PTS repeats are primary targets for O-glycosylation of the protein. Unlike the larger soluble gel-forming mucins, where dense O-glycosylation aids in lubricating m…	Xu et al. 2017
ZNF365	rs7076156, non-synonymous archaic allele: 64415184; archaic haplotype: 64387934-64447352 (GhRch37/hg19)		10		positive selection	Neanderthal	Europeans (23.7-31.5%); East Asians (7.3-14.1%); South Asians (12.2-14.2%)	Carries a non-synonymous allele associated with risk of Crohn’s disease.GWAS phenotype: Crohn`s disease and psoriasis, Crohn`s disease. Cells - EBV-transformed lymphocytes (upregulation).	Dannemann et al. 2017
From Deschamps et al. 2016
IL17F						Neanderthal	Europeans, Asians	Innate immunity effector	Deschamps et al., 2016
CLEC3A						Neanderthal	Europeans, Asians	Innate immunity sensor	Deschamps et al., 2016
SRMS						Neanderthal	Europeans, Asians	Innate immunity regulator	Deschamps et al., 2016
PTK6						Neanderthal	Europeans, Asians	Innate immunity regulator	Deschamps et al., 2016
IFITM2	MIM: 604456					Neanderthal	Europeans, Asians	Innate immunity effector. A family of restriction factors that restrict the replication of multiple viruses in vitro, including influenza A, dengue, and West Nile.	Deschamps et al., 2016
IFITM1	MIM: 605578					Neanderthal	Europeans, Asians	Innate immunity effector. A family of restriction factors that restrict the replication of multiple viruses in vitro, including influenza A, dengue, and West Nile.	Deschamps et al., 2016
IFITM3	MIM:605579					Neanderthal	Europeans	Innate immunity effector. A family of restriction factors that restrict the replication of multiple viruses in vitro, including influenza A, dengue, and West Nile. Variation at IFITM3 has been suggested to alter the morbidity and mortality associated with influenza infection in humans.	Deschamps et al., 2016
PRKCQ						Neanderthal	Europeans	Innate immunity signal transducer	Deschamps et al., 2016
ACTR2						Neanderthal	Europeans	Innate immunity	Deschamps et al., 2016
AVP						Neanderthal	Europeans, Asians	Innate immunity	Deschamps et al., 2016
ARRB2						Neanderthal	Europeans	Innate immunity regulator	Deschamps et al., 2016
ITPR3						Neanderthal	Europeans	Innate immunity	Deschamps et al., 2016
ITPR2						Neanderthal	Europeans	Innate immunity	Deschamps et al., 2016
TLR1						Neanderthal	Europeans	Innate immunity sensor	Deschamps et al., 2016
EPRS						Neanderthal	Europeans	Innate immunity regulator	Deschamps et al., 2016
NLRP6						Neanderthal	Europeans	Innate immunity sensor	Deschamps et al., 2016
MAVS						Neanderthal	Europeans	Innate immunity adaptor	Deschamps et al., 2016
FCGR2A						Neanderthal	Europeans	Innate immunity sensor	Deschamps et al., 2016
KAT2B						Neanderthal	Europeans	Innate immunity	Deschamps et al., 2016
TRIML1						Neanderthal	Europeans	Innate immunity regulator	Deschamps et al., 2016
KRAS						Neanderthal	Europeans	Innate immunity signal transducer	Deschamps et al., 2016
FCGR2B						Neanderthal	Europeans	Innate immunity sensor	Deschamps et al., 2016
TLR2						Neanderthal	Europeans	Innate immunity sensor	Deschamps et al., 2016
DDX21						Neanderthal	Europeans	Innate immunity adaptor	Deschamps et al., 2016
MMP12						Neanderthal	Europeans	Innate immunity effector	Deschamps et al., 2016
FOS						Neanderthal	Europeans, Asians	Innate immunity transcription	Deschamps et al., 2016
CLEC11A						Neanderthal	Europeans	Innate immunity sensor	Deschamps et al., 2016
BIRC5						Neanderthal	Europeans	Innate immunity regulator	Deschamps et al., 2016
SLAMF8						Neanderthal	Europeans	Innate immunity sensor	Deschamps et al., 2016
MAP1LC3C						Neanderthal	Europeans, Asians	Innate immunity effector	Deschamps et al., 2016
PRF1						Neanderthal	Europeans	Innate immunity effector	Deschamps et al., 2016
PLA2R1						Neanderthal	Europeans	Innate immunity sensor	Deschamps et al., 2016
NOXA1						Neanderthal	Europeans	Innate immunity effector	Deschamps et al., 2016
PRKCG						Neanderthal	Europeans, Asians	Innate immunity signal transducer	Deschamps et al., 2016
ACAP1						Neanderthal	Europeans, Asians	Innate immunity	Deschamps et al., 2016
ELANE						Neanderthal	Europeans	Innate immunity regulator	Deschamps et al., 2016
LY75						Neanderthal	Europeans	Innate immunity sensor	Deschamps et al., 2016
TNFSF9						Neanderthal	Europeans	Innate immunity effector	Deschamps et al., 2016
PRTN3						Neanderthal	Europeans	Innate immunity adaptor	Deschamps et al., 2016
HSP90AB1						Neanderthal	Europeans, Asians	Innate immunity accessory molecule	Deschamps et al., 2016
TRIB3						Neanderthal	Europeans	Innate immunity regulator	Deschamps et al., 2016
IRF2						Neanderthal	Europeans	Innate immunity transcription	Deschamps et al., 2016
CD80						Neanderthal	Europeans	Innate immunity effector	Deschamps et al., 2016
PPARGC1B						Neanderthal	Europeans	Innate immunity signal transducer	Deschamps et al., 2016
ATF3						Neanderthal	Europeans, Asians	Innate immunity transcription	Deschamps et al., 2016
AQP3						Neanderthal	Europeans	Innate immunity	Deschamps et al., 2016
CLEC2L						Neanderthal	Europeans, Asians	Innate immunity sensor	Deschamps et al., 2016
ERAP1						Neanderthal	Europeans	Innate immunity	Deschamps et al., 2016
CXCL16						Neanderthal	Europeans	Innate immunity effector	Deschamps et al., 2016
TXN						Neanderthal	Europeans, Asians	Innate immunity regulator	Deschamps et al., 2016
CD209						Neanderthal	Europeans	Innate immunity sensor	Deschamps et al., 2016
TNK1						Neanderthal	Europeans	Innate immunity signal transducer	Deschamps et al., 2016
CLEC4G						Neanderthal	Europeans	Innate immunity sensor	Deschamps et al., 2016
TNFRSF13B						Neanderthal	Europeans	Innate immunity secondary receptor	Deschamps et al., 2016
HSP90B1						Neanderthal	Europeans, Asians	Innate immunity accessory molecule	Deschamps et al., 2016
ART1						Neanderthal	Europeans	Innate immunity	Deschamps et al., 2016
BTN3A3						Neanderthal	Europeans	Innate immunity sensor	Deschamps et al., 2016
CD302						Neanderthal	Europeans	Innate immunity sensor	Deschamps et al., 2016
CAMKK2						Neanderthal	Europeans	Innate immunity signal transducer	Deschamps et al., 2016
JAK3						Neanderthal	Europeans	Innate immunity signal transducer	Deschamps et al., 2016
CTSH						Neanderthal	Asians	Innate immunity accessory molecule	Deschamps et al., 2016
NLRC5	MIM: 613537					Neanderthal	Asians	Innate immunity sensor	Deschamps et al., 2016
BCL2A1						Neanderthal	Asians	Innate immunity regulator	Deschamps et al., 2016
IL17A						Neanderthal	Asians	Innate immunity effector	Deschamps et al., 2016
TRIM32						Neanderthal	Asians	Innate immunity regulator	Deschamps et al., 2016
IGF1						Neanderthal	Asians	Innate immunity effector	Deschamps et al., 2016
NRIP1						Neanderthal	Asians	Innate immunity transcription	Deschamps et al., 2016
GJA1						Neanderthal	Asians	Innate immunity	Deschamps et al., 2016
EGF						Neanderthal	Asians	Innate immunity effector	Deschamps et al., 2016
CDKN2A						Neanderthal	Asians	Innate immunity regulator	Deschamps et al., 2016
DUSP16						Neanderthal	Asians	Innate immunity regulator	Deschamps et al., 2016
APAF1						Neanderthal	Asians	Innate immunity transducer	Deschamps et al., 2016
KRT1						Neanderthal	Asians	Innate immunity regulator	Deschamps et al., 2016
SYK						Neanderthal	Asians	Innate immunity adaptor	Deschamps et al., 2016
GRK5						Neanderthal	Asians	Innate immunity regulator	Deschamps et al., 2016
CAMK2D						Neanderthal	Asians	Innate immunity	Deschamps et al., 2016
NXN						Neanderthal	Asians	Innate immunity signal transducer	Deschamps et al., 2016
TP73						Neanderthal	Asians	Innate immunity transcription	Deschamps et al., 2016
TRIM62						Neanderthal	Asians	Innate immunity regulator	Deschamps et al., 2016
CCR4						Neanderthal	Asians	Innate immunity secondary receptor	Deschamps et al., 2016
TRIM71						Neanderthal	Asians	Innate immunity regulator	Deschamps et al., 2016
MT2A						Neanderthal	Asians	Innate immunity	Deschamps et al., 2016
EYA4						Neanderthal	Asians	Innate immunity regulator	Deschamps et al., 2016
IFNA1						Neanderthal	Asians	Innate immunity effector	Deschamps et al., 2016
IFNA8						Neanderthal	Asians	Innate immunity effector	Deschamps et al., 2016
IFNE						Neanderthal	Asians	Innate immunity effector	Deschamps et al., 2016
POLR2E						Neanderthal	Asians	Innate immunity sensor	Deschamps et al., 2016
BDKRB2						Neanderthal	Asians	Innate immunity sensor	Deschamps et al., 2016
TRIM29						Neanderthal	Asians	Innate immunity regulator	Deschamps et al., 2016
SOS1						Neanderthal	Asians	Innate immunity regulator	Deschamps et al., 2016
BCL3						Neanderthal	Asians	Innate immunity signal transducer	Deschamps et al., 2016
CFI						Neanderthal	Asians	Innate immunity regulator	Deschamps et al., 2016
IFNA2						Neanderthal	Asians	Innate immunity effector	Deschamps et al., 2016
SMAD6						Neanderthal	Asians	Innate immunity signal transducer	Deschamps et al., 2016
CD22						Neanderthal	Asians	Innate immunity regulator	Deschamps et al., 2016
PPP3R1						Neanderthal	Asians	Innate immunity signal transducer	Deschamps et al., 2016
REG3G						Neanderthal	Asians	Innate immunity sensor	Deschamps et al., 2016
SPINK5						Neanderthal	Asians	Innate immunity adaptor	Deschamps et al., 2016
IFIT5						Neanderthal	Asians	Innate immunity sensor	Deschamps et al., 2016
IRF6						Neanderthal	Asians	Innate immunity transcription	Deschamps et al., 2016
SIRT1	MIM: 607199					Neanderthal	Asians	Innate immunity	Deschamps et al., 2016
Cell development and regulation
ERBB3	MIM 190151	12q13.2; 56080025-56103507 (GRCh38/hg38)	12	beneficial		Neanderthal		The variant within ERBB3 intracellular domain of the tyrosine-kinase-type cell-surface receptor ERBB3. ERBB3 and ERBB2 form a heterodimer that plays an important role in cell growth, survival, and differentiation and in the suppression of apoptosis	Mendez et al. 2012
ESYT1	STAT2, ERBB3 and ESYT1 constitute haplotype of 250 Kb	12q13.2; 56118250-56144676 (GRCh38/hg38)	12	beneficial		Neanderthal		ESYT1, which has ubiquitous expression, encodes for the extended synaptotagmin-like protein 1 (ESYT1), a type I transmembrane protein. The expression of ESYT1 is dramatically induced during differentiation of fibroblasts into adipocytes.	Mendez et al. 2012
PTHLH	rs10771399	28130906-28182252 (GhRch37/hg19)	12			Neanderthal	Turkish; allele frequency = 0.21875	Cancer	Taskent et al. 2017
NR	rs76010824	67439555-67488793 (GhRch37/hg19)	3			Neanderthal	Turkish; allele frequency = 0.1875	Cancer	Taskent et al. 2017
WNT4, CDC42	rs72647484	22534050-22641007 (GhRch37/hg19)	1			Neanderthal	Turkish; allele frequency = 0.03125	Cancer	Taskent et al. 2017
SHPRH	frame shift insertion in position 146185477 (GhRch37/hg19)		6	likely disruptive		Neanderthal	East Asians (allele frequency = 0.05)	SHPRH is a ubiquitously expressed protein that contains motifs characteristics of several DNA repair proteins, transcription factors, and helicases.	Chintalapati et al. 2017
DDTL	frame shift deletion in position 24313530 (GhRch37/hg19)		22	likely disruptive		Neanderthal	Europeans (allele frequency = 0.002); East Asians (allele frequency = 0.03)	DDTL (D-Dopachrome Tautomerase Like) is a Protein Coding gene. Gene Ontology (GO) annotations related to this gene include lyase activity.	Chintalapati et al. 2017
MAB21L2	Downstream deletion in position 151508852 (GhRch37/hg19)		4	likely disruptive		Neanderthal	Europeans (allele frequency = 0.004)	This gene is similar to the C. elegans MAB-21 cell fate-determining gene, a downstream target of transforming growth factor-beta signaling. It is thought that this gene may be involved in neural development. The protein encoded by this gene is primarily nuclear, although some cytoplasmic localization has been observed. MAB21L2 (Mab-21 Like 2) is a Protein Coding gene. Diseases associated with MAB…	Chintalapati et al. 2017
LINC01116	Upstream insertion in position 177503917 (GhRch37/hg19)		2	likely disruptive		Neanderthal	East Asians (allele frequency = 0.004)	LINC01116 (Long Intergenic Non-Protein Coding RNA 1116) is an RNA Gene, and is affiliated with the non-coding RNA class; supposedly associated with prostate and breast cancer.	Chintalapati et al. 2017
RABEP2	Downstream insertion in position 28915046 (GhRch37/hg19)		16	likely disruptive		Neanderthal	East Asians (allele frequency = 0.01)	RABEP2 (Rabaptin, RAB GTPase Binding Effector Protein 2) is a Protein Coding gene. Gene Ontology (GO) annotations related to this gene include GTPase activator activity and growth factor activity. Plays a role in membrane trafficking and in homotypic early endosome fusion.	Chintalapati et al. 2017
CHPT1	Downstream deletion in position 102125452 (GhRch37/hg19)		12	likely disruptive		Neanderthal	Europeans (allele frequency = 0.008); East Asians (allele frequency = 0.3)	CHPT1 (Choline Phosphotransferase 1) is a Protein Coding gene. Among its related pathways are Glycerophospholipid biosynthesis and Metabolism. Gene Ontology (GO) annotations related to this gene include diacylglycerol binding and diacylglycerol cholinephosphotransferase activity. Catalyzes phosphatidylcholine biosynthesis from CDP-choline. It thereby plays a central role in the formation and main…	Chintalapati et al. 2017
CSMD1	Intronic deletion in position 4762649 (GhRch37/hg19)		8	likely disruptive		Neanderthal	Europeans (allele frequency = 0.003); East Asians (allele frequency = 0.09)	CSMD1 CUB and Sushi multiple domains 1 is a protein that in humans is encoded by the CSMD1 gene. CUB is a structural motif. It is a potential tumour suppressor, the deletion of which may result in head and neck carcinomas behaving more aggressively.	Chintalapati et al. 2017
CSMD1		8p23.2; 2935352-4995034 (GRCh38/hg38)	8			Unknown archaic African Hominin population	African	CSMD1 CUB and Sushi multiple domains 1 is a protein that in humans is encoded by the CSMD1 gene. CUB is a structural motif. It is a potential tumour suppressor, the deletion of which may result in head and neck carcinomas behaving more aggressively.	Lachance et al. 2012
PDE4D	Intronic deletion in position 58519627 (GhRch37/hg19)		5	likely disruptive		Neanderthal	Europeans (allele frequency = 0.004); East Asians (allele frequency = 0.05)	The encoded protein has 3',5'-cyclic-AMP phosphodiesterase activity and degrades cAMP, which acts as a signal transduction molecule in multiple cell types. This gene uses different promoters to generate multiple alternatively spliced transcript variants that encode functional proteins. Hydrolyzes the second messenger cAMP, which is a key regulator of many important physiological processes.	Chintalapati et al. 2017
PAX3	intronic insertion in position 223154225 (GhRch37/hg19)		2	likely disruptive		Neanderthal	Europeans (allele frequency = 0.001); East Asians (allele frequency = 0.001)	This gene is a member of the paired box (PAX) family of transcription factors. Members of this gene family typically encode proteins which contain a paired box domain, an octapeptide, and a paired-type homeodomain.	Chintalapati et al. 2017
WWOX	Intronic deletion in position 79076425 (GhRch37/hg19)		16	likely disruptive		Neanderthal	Europeans (allele frequency = 0.05); East Asians (allele frequency = 0.001)	Putative oxidoreductase. Acts as a tumor suppressor and plays a role in apoptosis. Required for normal bone development (By similarity). May function synergistically with p53/TP53 to control genotoxic stress-induced cell death. Plays a role in TGFB1 signaling and TGFB1-mediated cell death. May also play a role in tumor necrosis factor (TNF)-mediated cell death. Inhibits Wnt signaling, probably by…	Chintalapati et al. 2017
Metabolism
CHMP4BP1	gene indel; SNP rs17673930, position 55808151 in LD with indel in position 55769446 (GhRch37/hg19)		14			Neanderthal	Europeans (allele frequency = 0.08); East Asians (allele frequency = 0.006)	Protein biomarker	Chintalapati et al. 2017
UBE2E2	gene indel; SNP rs17013049, position 23385942 in LD with indel in position 23386162 (GhRch37/hg19)		3			Neanderthal	Europeans (allele frequency = 0.02); East Asians (allele frequency = 0.11)	Type 2 diabetes	Chintalapati et al. 2017
intergenic indel	SNP rs35640669, position 87177586 in LD with indel in position 87171753 (GhRch37/hg19)		9			Neanderthal	Europeans (allele frequency = 0.03); East Asians (allele frequency = 0.05)	Insulin-related traits	Chintalapati et al. 2017
EGLN1		231457651-231657496 (GhRch37/hg19)	1	beneficial	positive selection candidate	Denisovan	Tibetian	Tibetan-specific EGLN1 haplotype encoding PHD2 which abrogates HIF augmentation in hypoxia.	Hu et al. 2017; Tashi et al. 2017
EPAS1	32.7kb haplotype block in th egene and 150kb 3' region of EPAS1	46533376-46792633 (GhRch37/hg19)	2	beneficial	positive selection candidate	Denisovan	Tibetian	Protection from hypoxia-induced polycythemia, and a haplotype of EPAS1, encoding hypoxia-inducible factor (HIF-2α), has been associated with lower hemoglobin levels.	Huerta-Sanches et al. 2014; Hu et al. 2017; Tashi et al. 2017
PTGIS		20q13.13; 49503874-49568170 (GRCh38/hg38)	20	beneficial	positive selection candidate	Denisovan	Tibetian	Associated with three hypoxia-response GO terms (0071456, 0036294,0071453) and regulated by hypoxiainducible factor 1 (HIF-1). PTGIS encodes prostaglandin I2 synthase, which participates in the synthesis of prostanoid.	Hu et al. 2017
VDR		48257328-48357328 (GhRch37/hg19)	12	beneficial	positive selection candidate	Denisovan	Tibetian	Encodes the vitamin D3 receptor. Mutations in this gene can cause an abnormality in vitamin D metabolism, which may in turn lead to rickets and preterm birth.	Hu et al. 2017
KCTD12			2	beneficial	positive selection candidate	Denisovan	Tibetian	Potassium channel tetramerization domain containing 12, a component of the G-protein-coupled receptors for γ-aminobutyric acid (GABA) receptor.	Hu et al. 2017
SLCO1B1	rs11045818	21303439-21372344 (GhRch37/hg19)	12			Neanderthal	Turkish; allele frequency = 0.09375	Drug	Taskent et al. 2017
ADAMTS18	rs12935229	77287936-77338208 (GhRch37/hg19)	16			Neanderthal	Turkish; allele frequency = 0.125	Drug	Taskent et al. 2017
ARID5B, RTKN2	rs7912580	63914890-63960611 (GhRch37/hg19)	10			Neanderthal	Turkish; allele frequency = 0.0625	Drug	Taskent et al. 2017
LIMK2	rs2106294	31638027-31701821 (GhRch37/hg19)	22			Neanderthal	Turkish; allele frequency = 0.3125	Metabolism	Taskent et al. 2017
SLCO1B1	rs12829704	21384382-21411854 (GhRch37/hg19)	12			Neanderthal	Turkish; allele frequency = 0.125	Metabolism	Taskent et al. 2017
CYP2C9	rs2185570	96675093-96824260 (GhRch37/hg19)	10			Neanderthal	Turkish; allele frequency = 0.125	Metabolism	Taskent et al. 2017
IFNGR1	rs13201877	137625741-137689061 (GhRch37/hg19)	6			Neanderthal	Turkish; allele frequency = 0.09375	Metabolism; associated with Body Mass Index (BMI)	Taskent et al. 2017
DIP2C	rs877282	722732-822757 (GhRch37/hg19)	10			Neanderthal	Turkish; allele frequency = 0.09375	Metabolism	Taskent et al. 2017
PTDSS2, RNH1, HRAS	rs10540	457879-539058 (GhRch37/hg19)	11			Neanderthal	Turkish; allele frequency = 0.0625; 7% and 11% in European populations; only rarely in East Asian	Metabolism; associated with Body Mass Index (BMI); RNH1 is an RNAse inhibitor and has been shown to regulate angiogenin; HRAS is a well- studied proto-oncogene, developmentally important with variants associated with the Costello syndrome and myopathy with excess of muscle spindles; PTDSS2 is the main enzyme in the biosynthesis of phosphatidylserine, which accounts for up to 10% of cell membrane …	Taskent et al. 2017
AF086303	rs72960926	75148132-75289753 (GhRch37/hg19)	6			Neanderthal	Turkish; allele frequency = 0.03125	Metabolism	Taskent et al. 2017
YIPF1	rs11206226	54256324-54340621 (GhRch37/hg19)	1			Neanderthal	Turkish; allele frequency = 0.1875	Metabolism	Taskent et al. 2017
TBX15/WARS2	introgressed haplotype position: 119541452-119627434 (GhRch37/hg19); SNPs: rs2298080, rs10923735, rs12030972, rs12026409, rs10923726, rs4659140, rs12027501, rs12027524, rs12410034, rs12410034, rs4658995, rs1325932, rs1325931, rs1325930, rs10923730, rs963171, rs3951792, rs12024063, rs12031562, rs12031597, rs12021830, rs10923733, rs10494218, rs10494219, rs12402563, rs12405154, rs12025128, rs1133898…		1	beneficial	positive selection	Denisovan-like	East Asians 48.41%; Europeans 19.78%; South Asians 12.73%; Greenlanders 99.74%; Native Americans 98%	The TBX15/WARS2 region is highly pleiotropic: it has been found to be associated with a variety of traits. These include the differentiation of adipose tissue , body fat distribution, facial morphology, stature, ear morphology, hair pigmentation, and skeletal development. WARS2 encodes the mitochondrial tryptophanyl-tRNA synthetase. TBX15 is a transcription factor from the T-box family and is a h…	Racimo et al. 2017
ACOT4	frame shift insertion in position 74060511 (GhRch37/hg19)		14	likely disruptive		Neanderthal	Europeans (allele frequency = 0.006)	Acyl-CoA thioesterases, such as ACOT4, hydrolyze acyl-CoAs to the free fatty acid and CoA. ACOTs therefore play key roles in maintaining the intracellular ratio between CoA esters of various lipids and free fatty acids	Chintalapati et al. 2017
IGLV3-27	frame shift deletion in position 23011159 (GhRch37/hg19)		22	likely disruptive		Neanderthal	East Asians (allele frequency = 0.01)	V region of the variable domain of immunoglobulin light chains that participates in the antigen recognition	Chintalapati et al. 2017
NUAK2	Upstream deletion in position 205293177 (GhRch37/hg19)		1	likely disruptive		Neanderthal	Europeans (allele frequency = 0.008); East Asians (allele frequency = 0.002)	NUAK2 (NUAK Family Kinase 2) is a Protein Coding gene. Among its related pathways are Cytoskeletal Signaling and Glucose / Energy Metabolism. Gene Ontology (GO) annotations related to this gene include transferase activity, transferring phosphorus-containing groups and protein tyrosine kinase activity. Stress-activated kinase involved in tolerance to glucose starvation. Induces cell-cell detachme…	Chintalapati et al. 2017
STARD3	Inframe deletion in position 37815323 (GhRch37/hg19)		17	likely disruptive		Neanderthal	Europeans (allele frequency = 0.003)	StAR-related lipid transfer domain protein 3 ( STARD3 ) also known as metastatic lymph node 64 protein ( MLN64 ) is a late endosomal integral membrane protein involved in cholesterol transport.	Chintalapati et al. 2017
DDX60L	rs17612333; 169330384; archaic haplotype: 169300451-169340431 (GhRch37/hg19).		4		positive selection	Neanderthal	Native Americans; Europeans (12.6-20.7%); East Asians (10.4–14.4%); South Asians (7.5-14.6%)	The archaic allele is associated with reduced expression of DDX60L in subcutaneous adipose tissue and an increased body mass index (BMI). Adipose - Subcutaneous (downregulation), Heart - Atrial Appendage (downregulation), Pituitary (dowregulaiton)	Dannemann et al. 2017
DNAJC13	archaic haplotype: 132119691-132421998 (GhRch37/hg19).		3			Neanderthal		GWAS phenotype: LDL cholesterol, HDL cholesterol; Brain - Putamen (basal ganglia) (downregulation).	Dannemann et al. 2017
BCHE	archaic haplotype: 165476224-165603543 (GhRch37/hg19).		3			Neanderthal		GWAS phenotype: Butyrylcholinesterase levels; Adipose - Subcutaneous (downregulation), Skin - Not Sun Exposed (Suprapubic) (downregulation), Thyroid (downregulation).	Dannemann et al. 2017
KIAA1919	archaic haplotype: 111415836-111951212 (GhRch37/hg19).		6			Neanderthal		GWAS phenotype: Metabolite levels; Adrenal Gland (downregulation), Colon - Sigmoid (downregulation), Esophagus – Muscularis (downregulation), Heart - Atrial Appendage (downregulation), Heart - Left Ventricle (downregulation), Liver (downregulation), Lung (downregulation), Pancreas (downregulation), Thyroid (downregulation).	Dannemann et al. 2017
SLC16A10	archaic haplotype: 111415836-111951212 (GhRch37/hg19).		6			Neanderthal		GWAS phenotype: Metabolite levels; Brain - Anterior cingulate cortex (BA24) (downregulation)	Dannemann et al. 2017
SULT2A1	archaic haplotype: 48332914-48465312 (GhRch37/hg19).		19			Neanderthal		GWAS phenotype: Dehydroepiandrosterone sulphate levels; Adrenal Gland (downregulation)	Dannemann et al. 2017
REV3L	non-synonymous archaic allele: 111628626 (GhRch37/hg19).		6		positive selection	Neanderthal		GWAS phenotype: Metabolite levels	Dannemann et al. 2017
CYP2C8	non-synonymous archaic allele: 96798749 (GhRch37/hg19).		10			Neanderthal		GWAS phenotype: Acenocoumarol maintenance dosage	Dannemann et al. 2017
Digestive system
OR12D3	archaic haplotype: 29275499-29401057 (GhRch37/hg19).		6		positive selection	Neanderthal		Esophagus - Mucosa (upregulation)	Dannemann et al. 2017
Muscle
distrophin	8-kb segment of dys44 haplotypes on Xp21.2-p21.1; 31119219-33339609 (GRCh38.p12)	Xp21.2-p21.1; 31119219-33339609 (GRCh38.p12)	X			archaic Homo	sub-Saharan Africans	Dystrophin is a rod-shaped cytoplasmic protein, and a vital part of a protein complex that connects the cytoskeleton of a muscle fiber to the surrounding extracellular matrix through the cell membrane. Duchenne (DMD) and Becker muscular dystrophy are caused by mutations in the dystrophin (dys) gene.	Labuda et al. 2000
TMEM123	archaic haplotype: 102344970-102353988 (GhRch37/hg19).		11		positive selection	Neanderthal		Colon - Transverse (upregulation), Heart - Left Ventricle (upregulation), Muscle - Skeletal (upregulation).	Dannemann et al. 2017
POU2F3	archaic haplotype: 120084221-120124302 (GhRch37/hg19).		11		positive selection	Neanderthal		Esophagus – Muscularis (downregulation), Heart - Left Ventricle (downregulation)	Dannemann et al. 2017
NFKBIE	non-synonymous archaic allele: 44232977; archaic haplotype: 44228815-44282897 (GhRch37/hg19).		6		positive selection	Neanderthal	Europeans, Asians	GWAS phenotype: Rheumatoid arthritis; Colon - Transverse (downregulation), Pancreas (downregulation). Innate immunity signal traducer.	Deschamps et al., 2016; Dannemann et al., 2017
Hair color
SPIRE2	rs62052168; archaic haplotype (hg19): 89813988–90008296		16	beneficial			individuals of British ancestry	Hair color; associated eQTLs: muscle (skeletal), heart (atrial appendage), adipose (visceral; omentum); skin (not sun exposed; suprapubic), minor salivary gland, esophagus (muscularis), esophagus (mucosa), esophagus (gastresophageal junction), testis, skin (sun exposed; lower leg), adipose (subcutaneous), nerve (tibial), artery (tibial), heart (left ventricle), cells (transformed fibroblasts), ar…	Dannemann&Kelso 2017
MC1R	rs62052168; archaic haplotype (hg19): 89813988–90008296		16	beneficial			individuals of British ancestry	Hair color; associated eQTLs: breast (mammary tissue)	Dannemann&Kelso 2017
FANCA	rs62052168; archaic haplotype (hg19): 89813988–90008296		16	beneficial			individuals of British ancestry	Hair color; associated eQTLs: muscle (skeletal), lung, pancreas, esophagus (muscularis), adipose (subcutaneous), nerve (tibial), artery (tibial), whole blood	Dannemann&Kelso 2017
TCF25	rs62052168; archaic haplotype (hg19): 89813988–90008296		16	beneficial			individuals of British ancestry	Hair color; associated eQTLs: uterus, brain (putamen; basal ganglia)	Dannemann&Kelso 2017
TUBB3	rs62052168; archaic haplotype (hg19): 89813988–90008296		16	beneficial			individuals of British ancestry	Hair color; associated eQTLs: vagina, esophagus (mucosa)	Dannemann&Kelso 2017
SLC24A4	rs77004437; archaic haplotype (hg19): 92767097–92801297		14	beneficial			individuals of British ancestry; Europeans	Hair color; associated eQTLs: muscle (skeletal). Innate immunity accessory molecule.	Deschamps et al., 2016; Dannemann&Kelso 2017
EXOC2	rs71550011; archaic haplotype (hg19): 503851–544833		6	beneficial			individuals of British ancestry	Hair color; associated eQTLs: cells (transformed fibroblasts)	Dannemann&Kelso 2017
Skin color
MC1R	loss-of-function allele Val92Met, rs2228479*A, chr16q24.3, gene span 3099bp		16	beneficial	Possible local adaptation of modern Eurasians to sunlight intensity	Neanderthal	Europeans (around 5%); East Asians (around 30%); Taiwanese aborigines (60-70%)	Red hairness, associated with pain sensitivity in women, making them particularly prone to colorectal, cervical, uterine, and ovarian cancer. It is suspected to alter the a-helix structure of the second transmembrane domain of MC1R. In vitro study found that the Val92Met variant could reduce the affinity of MC1R to a-MSH by approximately 5-fold, suggesting that the Val92Met variant alters normal …	Ding et al. 2014; Frost et al. 2017
RUNX2	rs115127056; archaic haplotype (hg19): 45533261–45680205		6	beneficial			individuals of British ancestry	Skin color; associated eQTLs: brain (cerebellum), brain (hippocampus), brain (cerebellar hemisphere)	Dannemann&Kelso 2017
BNC2	rs10962612; archaic haplotype (hg19): 16720122–16804167		9	beneficial	positive selecion, local adaptation	Neanderthal	individuals of British ancestry	Ease of skin tanning; incidence of childhood sunburn; associated eQTLs: muscle (skeletal)	Dannemann&Kelso 2017
BNC2*	rs62543578; archaic haplotype (hg19): 16891561–16915874		9	beneficial	positive selection, local adaptation	Neandertal	individuals of British ancestry	skin color	Dannemann&Kelso 2017
CHORDC1*	rs74918882; archaic haplotype (hg19): 89996325–90041511		11	beneficial			individuals of British ancestry	skin color	Dannemann&Kelso 2017
OAS1	archaic haplotype: 113350796-113444418 (GhRch37/hg19)		12		positive selection	Neanderthal	Europeans (27.8-44.4%); East Asians (15.9-34.7%); South Asians (19.2-34.9%)	Introgressed alleles modify expression of the gene. Archaic alleles in this gene are associated with higher expression in subcutaneous adipose tissue and sun-exposed skin. Individuals carrying archaic alleles show down-regulation of this gene in esophagus mucosa and spleen. Adipose – Subcutaneous (upregulation), Esophagus – Mucosa (downregulation), Skin - Sun Exposed (Lower leg) (upregulation), S…	Dannemann et al. 2017
Height
ZNF536	rs56199929; archaic haplotype (hg19): 30982165–31041053		19	beneficial			individuals of British ancestry	Comparative height size at age 10 years; early life factors	Dannemann&Kelso 2017
SGCD	rs157350; position: 156038821-156180806		5			Neanderthal	Turkish; allele frequency = 0.03125	Anthropometric	Taskent et al. 2017
STAT2	non-synonymous archaic allele: 56740682; archaic haplotype: 56623347-56753822 (GhRch37/hg19)		12		Positive selection			GWAS phenotype: Height; Liver (upregulated)	Dannemann et al. 2017
Cardio-vascular system; blood
GJA1* (MIM:121014)	rs55913590; archaic haplotype (hg19): 121910814–122062861		6	beneficial			individuals of British ancestry	Pulse rate; blood pressure.	Dannemann&Kelso 2017
GOLGA6L4	rs12902672; archaic haplotype (hg19): 84703470–85114447		15	beneficial			individuals of British ancestry	Impedance of leg (left); associated eQTLs: small intestine (terminal ileum)	Dannemann&Kelso 2017
intergenic indel	SNP rs1016646, position 20263408 in LD with indel in position 20253488 (GhRch37/hg19)		8			Neanderthal	Europeans (allele frequency = 0.06); East Asians (allele frequency = 0.09)	Preeclampsia	Chintalapati et al. 2017
HBB	rs12788102; position: 4572048-4848163		11			Neanderthal	Turkish; allele frequency = 0.1875	Blood; the variant strongly associated with severity of malaria and thiss haplotype overlaps with multiple olfactory receptor 5 (OR5) subfamily genes.	Taskent et al. 2017
BCL11B	Upstream deletion in position 99742823 (GhRch37/hg19)		14	likely disruptive		Neanderthal	East Asians (allele frequency = 0.01)	B-cell lymphoma/leukemia 11B is a protein that in humans is encoded by the BCL11B gene. This gene encodes a C2H2-type zinc finger protein and is closely related to BCL11A, a gene whose translocation may be associated with B-cell malignancies. The specific function of this gene has not yet been determined, but it could also be involved in some malignancies.	Chintalapati et al. 2017
OR5V1	archaic haplotype: 29275499-29401057 (GhRch37/hg19).		6		positive selection	Neanderthal		Artery – Tibial (upregulation), Brain - Substantia nigra (upregulation), Heart - Atrial Appendage (upregulation), Heart - Left Ventricle (upregulation), Nerve – Tibial (upregulation), Testis.	Dannemann et al. 2017
OR14J1	archaic haplotype: 29275499-29401057 (GhRch37/hg19).		6		positive selection	Neanderthal		Heart - Left Ventricle (upregulation), Nerve - Tibial (upregulation)	Dannemann et al. 2017
RPH3A	archaic haplotype: 113350796-113444418 (GhRch37/hg19).		12		positive selection	Neanderthal		Artery – Tibial (upregulation)	Dannemann et al. 2017
NME7	archaic haplotype: 169133273-169453703 (GhRch37/hg19).		1			Neanderthal		GWAS phenotype: Venous thromboembolism; Colon – Sigmoid (upregulation), Lung (upregulation)	Dannemann et al. 2017
LRRC16A	archaic haplotype: 25319900-25408104 (GhRch37/hg19).		6			Neanderthal		GWAS phenotype: other erythrocyte phenotypes; Red blood cell traits; Cells - Transformed fibroblasts (upregulation), Ovary (downregulation).	Dannemann et al. 2017
DDC	archaic haplotype: 50482629-50575975 (GhRch37/hg19).		7			Neanderthal		GWAS phenotype: Acute lymphoblastic leukemia (B-cell precursor); Acute lymphoblastic leukemia (childhood); Brain - Cerebellar Hemisphere (upregulation) Muscle - Skeletal (downregulation), Testis (upregulation).	Dannemann et al. 2017
IPO7	archaic haplotype: 9374407-9498746 (GhRch37/hg19).		11			Neanderthal		GWAS phenotype: Blood pressure, Interleukin levels (IL10, IL1Ra, IL6), in plasma; Cells - EBV-transformed lymphocytes (downregulation).	Dannemann et al. 2017
PRKCH	non-synonymous archaic allele: 61924239 (GhRch37/hg19).		14		positive selection	Neanderthal		GWAS phenotype: Stroke	Dannemann et al. 2017
Vision
PBLD (MIM:612189)	rs12571093; archaic haplotype (hg19): 70009572–70059496		10	beneficial			individuals of British ancestry; Turkish (allele frequency =0.1875)	Vision; Sitting height (body-size measures); associated eQTLs: muscle (skeletal), brain (cortex), brain (caudate; basal ganglia), brain (putamen; basal ganglia)	Dannemann&Kelso 2017; Taskent et al. 2017
KCNT2	gene indel; SNP rs16839886, positon 196376474 in LD with indel in position 196365 712 (GhRch37/hg19)		1			Neanderthal	Europeans (allele frequency = 0.07); East Asians (allele frequency = 0.01)	Age-related macular degeneration	Chintalapati et al. 2017
intergenic	rs13201929; 117605912-117789914 (GhRch37/hg19)	117605912-117789914 (GhRch37/hg19)	6			Neanderthal	Turkish; allele frequency = 0.09375	Vision	Taskent et al. 2017
intergenic	rs61854810					Neanderthal	European ancestry (white race)	optic disc size; downregulation	McCoy et al. 2017
Pathogens
HPV58 variants of oncogenes for papillomavirus	500 sites (6.4%) changed across the complete genome		whole genome	disruptive	the majority of HPV58 variant genes are under purifying selection; while several codon sites under positive selection may affect viral phenotypes involved in facilitating host immune evasion, maintaining asymptomatic infection, or enhancing viral persistence and replication.	Neanderthal/Denisovan	East Asia, 10-18%	Papillomavirus agents	Chen et al. 2017
FAM114A1	archaic haplotype: 38763693-38906951 (GhRch37/hg19).		4			Neanderthal		GWAS phenotype: Helicobacter pylori serologic status, Self-reported allergy; Adipose - Subcutaneous (upregulation), Breast - Mammary Tissue (upregulation), Cells - EBV-transformed lymphocytes (upregulation), Esophagus - Gastroesophageal Junction (upregulation), Esophagus - Mucosa (upregulation), Lung (upregulation), Muscle - Skeletal (upregulation), Pituitary (upregulation), Skin - Sun Exposed (L…	Dannemann et al. 2017
TLR6	archaic haplotype: 38763693-38906951 (GhRch37/hg19).		4	positive selection	The TLR6-TLR1-TLR10 cluster has been proposed to be a hotspot of positive selection in human and non-human primates and is detected as a strongly supported case of local adaptation in Europeans.	Neanderthal	Europeans: 16%, Asians: 49%	Innate immunity sensor; GWAS phenotype: Helicobacter pylori serologic status, Self-reported allergy; Adipose - Subcutaneous (downregulation), Breast - Mammary Tissue (downregulation), Cells - EBV-transformed lymphocytes (upregulation), Esophagus - Mucosa (downregulation), Muscle - Skeletal (downregulation), Pituitary (upregulation), Skin - Sun Exposed (Lower leg) (downregulation), Spleen (downreg…	Deschamps et al., 2016; Dannemann et al. 2017
TLR10	archaic haplotype: 38763693-38906951 (GhRch37/hg19).		4	positive selection	The TLR6-TLR1-TLR10 cluster has been proposed to be a hotspot of positive selection in human and non-human primates and is detected as a strongly supported case of local adaptation in Europeans.	Neanderthal	Europeans: 16%, Asians: 49%	GWAS phenotype: Helicobacter pylori serologic status, Self-reported allergy; Adrenal Gland (upregulation); innate immunity sensor	Deschamps et al., 2016; Dannemann et al. 2017
Sexual development; fecundity
intergeic deletion	rs17188434SNP; position 157096996 in perfect LD with an indel in position 157099707 (GhRch37/hg19); minimum length of 180,900 bp for the introgressed segment		2	neutral		Neanderthal	Europeans (allele frequency = 0.06); East Asians (allele frequency = 0.01)	decrease in time to menarche, human carriers of the Neandertal allele showed an earlier menarche compared to non-carriers and the Neandertal allele	Chintalapati et al. 2017
PTCHD3	frame shift insertion in position 27687534 (GhRch37/hg19)		10	likely disruptive		Neanderthal	Europeans (allele frequency = 0.01); East Asians (allele frequency = 0.22)	the gene PTCHD3 (patched domain-containing protein-3) has a role in sperm development or sperm function and has been found to contain a risk-allele for asthma	Chintalapati et al. 2017
ALPP			2	putatively adaptive	positive selection candidate	Denisovan	Tibetian	Associated with pregnancy losses.	Hu et al. 2017
DNALI1	rs41267319			detrimental	purifying selection	Neanderthal	European ancestry (white race)	It encodes an axonemal dynein protein that functions in the sperm flagella. Highlighting the potential fitness consequences of introgression on testis-expressed genes, altered regulation of this gene set has been shown to contribute to hybrid incompatibility in other species.	McCoy et al. 2017
AP000679.2	archaic haplotype: 120084221-120124302 (GhRch37/hg19).		11		positive selection	Neanderthal		Esophagus – Mucosa (downregulation), Uterus (upregulation).	Dannemann et al. 2017
OR2H1	archaic haplotype: 29275499-29401057 (GhRch37/hg19).		6		positive selection	Neanderthal		Testis (downregulation), Vagina (upregulation)	Dannemann et al. 2017
KLK3	non-synonymous archaic allele: 51361757 (GhRch37/hg19).		19		positive selection	Neanderthal		GWAS phenotype: Prostate-specific antigen levels	Dannemann et al. 2017
Facial features
intergenic indel	SNP rs10863790, position 209988047 in LD with indel in position 209987712 (GhRch37/hg19)		1			Neanderthal	Europeans (allele frequency = 0.01); East Asians (allele frequency = 0.43)	Cleft lip	Chintalapati et al. 2017
SYT14	gene indel; SNP rs11119388, position 210174417 in LD with indel in position 210174981 (GhRch37/hg19)		1			Neanderthal	Europeans (allele frequency = 0.01); East Asians (allele frequency = 0.44)	Cleft lip	Chintalapati et al. 2017
IRF6	rs2235371					Neanderthal	European ancestry (white race)	Cleft lip; downregulation	McCoy et al. 2017
Lung
intergenic	rs10187654; 234754506-234862040 (GhRch37/hg19)		2			Neanderthal	Turkish; allele frequency = 0.78125	Lung	Taskent et al. 2017
MTMR3	rs36600; 30300112-30341260 (GhRch37/hg19)		22			Neanderthal	Turkish; allele frequency = 0.3125	Lung	Taskent et al. 2017
CEP72	rs72705102		5			Neanderthal		Cystic fibrosis lung function; downregulation	McCoy et al. 2017
GSTCD	rs10516526; archaic haplotype: 106508526-106814302 (GhRch37/hg19).		4			Neanderthal	Turkish; allele frequency = 0.09375; Europe.	Lung. GWAS phenotype: Pulmonary function, Pulmonary function (interaction); Pituitary (upregulation).	Taskent et al. 2017; Dannemann et al. 2017
INTS12	rs35370743					Neanderthal	European ancestry (white race)	pulmonary function (interaction with smoking)	McCoy et al. 2017
OR10C1	archaic haplotype: 29275499-29401057 (GhRch37/hg19).		6		positive selection	Neanderthal		Artery – Tibial (upregulation), Lung (upregulation)	Dannemann et al. 2017
Kidney
CEP89	rs10418340; archaic haplotype: 33190467-33468482 (GhRch37/hg19).		19			Neanderthal	European ancestry (white race)	serum creatinine levels- downregulation. GWAS phenotype: Urinary metabolites; Minor Salivary Gland (upregulation), Muscle - Skeletal (downregulation), Pituitary (upregulation), Testis (downregulation), Vagina (upregulation).	McCoy et al. 2017; Dannemann et al. 2017
TDRD12	non-synonymous archaic allele: 33309030 (GhRch37/hg19).		19		positive selection	Neanderthal		GWAS phenotype: Urinary metabolites	Dannemann et al. 2017
Nonfunctional or unknown function
intergenic insertion	position 21068784 (GhRch37/hg19)		7	likely disruptive		Neanderthal	Europeans (allele frequency = 0.01)		Chintalapati et al. 2017
LINC01117	intronic insertion in position 177503917 (GhRch37/hg19)		2	likely disruptive		Neanderthal	East Asians (allele frequency = 0.004)		Chintalapati et al. 2017
Intergenic deletion	position 117649011 (GhRch37/hg19)		4	likely disruptive		Neanderthal	Europeans (allele frequency = 0.04)		Chintalapati et al. 2017
Intergenic deletion	position 72876666 (GhRch37/hg19)		13	likely disruptive		Neanderthal	Europeans (allele frequency = 0.02)		Chintalapati et al. 2017
RP1-272L16.1	Intronic deletion in position 209738399 (GhRch37/hg19)		1	likely disruptive		Neanderthal	Europeans (allele frequency = 0.01); East Asians (allele frequency = 0.23)	lncRNA	Chintalapati et al. 2017
Intergenic deletion	position 98096123 (GhRch37/hg19)		9	likely disruptive		Neanderthal	East Asians (allele frequency = 0.04)		Chintalapati et al. 2017
RP11-613D13.4	Downstream deletion in position 44026804 (GhRch37/hg19)		11	likely disruptive		Neanderthal	Europeans (allele frequency = 0.001); East Asians (allele frequency = 0.03)		Chintalapati et al. 2017
Intergenic deletion	position 99240729 (GhRch37/hg19)		14	likely disruptive		Neanderthal	Europeans (allele frequency = 0.02)		Chintalapati et al. 2017
RP11-72M17.1	Intronic deletion in position 66722909 (GhRch37/hg19)		14	likely disruptive		Neanderthal	East Asians (allele frequency = 0.04)	lncRNA	Chintalapati et al. 2017
RPL21P8	Upstream deletion in position 65936081 (GhRch37/hg19)		14	likely disruptive		Neanderthal	Europeans (allele frequency = 0.003)	pseudogene	Chintalapati et al. 2017
Intergenic deletion	position 107927163 (GhRch37/hg19)		8	likely disruptive		Neanderthal	Europeans (allele frequency = 0.003)		Chintalapati et al. 2017
Intergenic deletion	position 175215413 (GhRch37/hg19)		5	likely disruptive		Neanderthal	Europeans (allele frequency = 0.008)		Chintalapati et al. 2017
CTD-2281M20.1	Intronic deletion in position 117827264 (GhRch37/hg19)		5	likely disruptive		Neanderthal	Europeans (allele frequency = 0.003); East Asians (allele frequency = 0.09)	lncRNA	Chintalapati et al. 2017
LINC01029	Upstream deletion in position 75697997 (GhRch37/hg19)		18	likely disruptive		Neanderthal	Europeans (allele frequency = 0.02); East Asians (allele frequency = 0.06)	lncRNA	Chintalapati et al. 2017
Intergenic deletion	position 46966402 (GhRch37/hg19)		1	likely disruptive		Neanderthal	East Asians (allele frequency = 0.05)		Chintalapati et al. 2017
SCARNA11	Downstream insertion in position 14020411 (GhRch37/hg19)		1	likely disruptive		Neanderthal	Europeans (allele frequency = 0.02); East Asians (allele frequency = 0.02)	scaRN	Chintalapati et al. 2017
Intergenic deletion	position 94667080 (GhRch37/hg19)		11	likely disruptive		Neanderthal	Europeans (allele frequency = 0.01)		Chintalapati et al. 2017
intergenic insertion	position 52608156 (GhRch37/hg19)		5	likely disruptive		Neanderthal	East Asians (allele frequency = 0.06)		Chintalapati et al. 2017
Intergenic deletion	position 83216710 (GhRch37/hg19)		1	likely disruptive		Neanderthal	East Asians (allele frequency = 0.03)		Chintalapati et al. 2017
Intergenic deletion	position 218868860 (GhRch37/hg19)		1	likely disruptive		Neanderthal	Europeans (allele frequency = 0.07); East Asians (allele frequency = 0.005)		Chintalapati et al. 2017
Intergenic deletion	position 154878448 (GhRch37/hg19)		5	likely disruptive		Neanderthal	East Asians (allele frequency = 0.05)		Chintalapati et al. 2017
Regulatory insertion	position 169381200 (GhRch37/hg19)		3	likely disruptive		Neanderthal	Europeans (allele frequency = 0.002); East Asians (allele frequency = 0.08)		Chintalapati et al. 2017
RRM2P4	2.4-kb fragment on Xq27.3		X	supposedly neutral		Homo erectus	very common in East and Central Asia but is nearly absent in African samples	pseudogene	Garrigan et al. 2005
Teeth
ENAM	T648I (rs 7671281)		4		positive selection	Neanderthal and Denisovan	worldwide frequency=0.82; AFR frequency= 0.47, AMR frequency =0.89, EUR frequency=0.95, EAS frequency= 0.98, SAS frequency = 0.94	Enamelin is the protein playing an essential role in the proper formation of enamel and involved in enamel thickness. ENAM amino acid substitution T648I is associated with a thinner enamel and may explain the difference in dental size between populations with African and non-African origins. This variant may have contributed to the continuous decrease in enamel thickness from Plio-Pleistocene hom…	Zanolli et al. 2017
	T415I (rs779308123)		4			Neanderthal	EUR frequency= < 0.0001		Zanolli et al. 2017
	R429H (rs375758699)		4			Denisovan	worldwide frequency= 0.0005		Zanolli et al. 2017
	T951M (rs561402393)		4			Neanderthal	EAS frequency= 0.0001, SAS frequency= 0.0001		Zanolli et al. 2017
	G389S (rs74511578)		4			Neanderthal/archaic Homo	worldwide frequency= 0.013; AFR frequency=0.05; AMR frequency=0.003		Zanolli et al. 2017
MGP	A8V (rs142330429)		4			Neanderthal and Denisovan	worldwide frequency= 0.02, EUR frequency= 0.004, EAS frequency= 0.031, SAS frequency= 0.043	Matrix Gla protein is an essential extracellular matrix protein that exerts an inhibitory control on tissue calcification. Functional deficit or reduced expression of the protein lead to tissue over-mineralization. As MGP is expressed in kidney, lung and heart, in addition to bone and teeth, protein disfunction is associated with severe cardiovascular diseases. The archaic and derived polymorphis…	Zanolli et al. 2017
DMP1	R173Q (rs747698893)		4			Denisovan	EAS frequency= 0.0001; SAS frequency=0.001	Dentin matrix acidic phosphoprotein 1 is expressed in odontoblasts and osteoblasts and regulates cell differentiation and biomineralization of dentin and bones. The protein acts as a transcriptional factor regulating the expression of bone and dental genes, and also participates in phosphate homeostasis. The Neanderthal (N483T) or Denisova (R173Q) variants have not been shown involved in a partic…	Zanolli et al. 2017
	N483T (rs574215585)					Neanderthal	worldwide frequency= 0.004; AFR frequency = 0.001; SAS frequency = 0.02		Zanolli et al. 2017
CEMP1	R15Q (rs370735504)					Denisovan	worldwide frequency=0.0001; AMR frequency= 0.001; EAS frequency= 0.001	Cementum protein 1 is an extracellular matrix protein, is considered as a marker of cementum. It plays a role in the differentiation of cementoblasts, and in the mineralization process by promoting the deposition and growth of hydroxyapaptite crystals. It may have biological importance for tissue regeneration in periodontal disease. To our knowledge, no CEMP1 polymorphisms, including the variants…	Zanolli et al. 2017
	R80H (rs79379654)					Denisovan/archaic Homo	worldwide frequency=0.001; AFR frequency = 0.005		Zanolli et al. 2017
AMTN	R171H (rs117133443)		4			Denisovan	worldwide frequency= 0.0001	Enamel matrix protein expressed during the maturation stage of amelogenesis and was proposed to promote hydroxyapatite precipitation. Two AMTN amino acid changes (R171H, A200V) were detected in the Denisova individual only and may form a haplotype characteristic of this lineage. The variants are not located in protein domains conserved during mammalian evolution or harboring biological activity.	Zanolli et al. 2017
	A200V (rs376682442)		4			Denisovan	worldwide frequency= 0.004; SAS frequency = 0.02		Zanolli et al. 2017
AMBN	M273V (rs564905233)		4			Denisovan	worldwide frequency=0.001; SAS frequency = 0.003	Ameloblastin interacts with amelogenin and participates in enamel formation by a not yet elucidated mechanism. Nevertheless, AMBN plays an essential role in amelogenesis as demonstrated by the severe hypoplasia of knock-out mice. The two variants identified in Neanderthal Vi3315 (G78S) and in Denisova (M273V) individuals are not located into any functional or conserved domains of the protein.	Zanolli et al. 2017
	G78S (rs143795139)		4			archaic Homo	African frequency=0.0001
